# Supplementary material for: η1and η2complexes of λ3-1,2,4,6-thiatriazinyls with CpCr(CO)x
Source: Royal Society of Chemistry journal article supplement (doi:10.1039/b610089a), 2006-01-01
Supplement: b610089a.pdf [file b610089a.pdf]

# $\eta^1$ and $\eta^2$ complexes of $\lambda^3$ -1,2,4,6-thiatriazinyls with $\text{CpCr(CO)}_x$ { $x = 2,3$ }

Chwee Ying Ang,<sup>a</sup> René T. Boéré,<sup>\*b</sup> Lai Yoong Goh,<sup>\*a</sup> Lip Lin Koh,<sup>a</sup> Seah Ling Kuan,<sup>a</sup> Geok Kheng Tan<sup>a</sup> and Xin Yu<sup>b</sup>

<sup>a</sup> Department of Chemistry, National University of Singapore, Kent Ridge, Singapore. Fax:(+65) 6779-1691;E-mail: chmgohly@nus.edu.sg.

<sup>b</sup> Department of Chemistry and Biochemistry, University of Lethbridge, Lethbridge, AB, Canada. Fax: (+1) 403-329-2057; Tel (+1) 403-329-2045; E-mail: boere@uleth.ca.

## Supplementary material

### B3PW91/6-31G+(d) calculations

The structures of diamagnetic adducts were optimized in their ground states using density functional theory in the GAUSSIAN 98W suite of programs.<sup>[1]</sup> The B3PW91 functional<sup>[2]</sup> with the 1991 gradient-corrected correlation functional of Perdew and Wang<sup>[3]</sup> was used; this hybrid functional has previously been shown to provide realistic geometries for organochromium complexes.<sup>[4]</sup> The Gaussian basis set 6-31+G(d) was used for geometry optimization and final energy calculations. The optimized geometry obtained at the B3PW91/6-31+g(d) level of theory for the model compound of **5** is shown in Figure S1. The calculations clearly demonstrate an interaction of the erstwhile  $\pi_4$  SOMO of the TTA radical with one of the “ $T_{2g}$ ” set of three bonding metal  $d$  orbitals. This is the only net bonding interaction of the ligand with the metal. Note that it is this same orbital that is

postulated to form the main “transannular” bond in dimers of the neutral thiatriazinyls such as **[4]**<sub>2</sub>.<sup>[5]</sup>

We have also performed B3PW91/6-31+g(d) calculations on a model of **14** using the same 3,5-dihydro thiatriazinyl ligand as employed in the model calculations for **5**. The optimized geometry is shown in Figure S2. The bonding interactions for this system are fully compatible with a 3e donor model for the ligand, and resemble those in the 1,2,3,5-dithiadiazoyl complexes with the same metal fragment **1** and **2**.<sup>[6]</sup>

### References

- [1] Gaussian 98W, Revision A.9, M. J. Frisch, *et al.* Gaussian, Inc., Pittsburg, PA, 1998.
- [2] A. D. Becke, *J. Chem. Phys.* 1993, **98**, 5648.
- [3] J. P. Perdew, Y. Wang, *Phys. Rev. B*, 1992, **45**, 13244.
- [4] C. N. Carlson, J. D. Smith, T. P. Hanusa, W. W. Brennessel, V. G. Young, Jr., *J. Organomet. Chem.* 2003, **683**, 191.
- [5] R. T. Boéré, A. W. Cordes, P. J. Hayes, R. T. Oakley, R. W. Reed, W. T. Pennington, *Inorg. Chem.*, 1986, **25**, 2445
- [6] H. F. Lau, V. W. L. Ng, L. L. Koh, G. K. Tan, L. Y. Goh, T. L. Roemmele, S. D. Seagrave and R. T. Boéré, *Angew. Chem.*, 2006, **118**, 4610; *Angew. Chem. Int. Ed.*, 2006, **45**, 4498.

B3PW91/6-31G+(d) calculations

Figure S1  $\text{CpCr(CO)}_3\{\eta^1\text{-SN}_3(\text{CH})_2\}$  -2217.3 631166 Hartree

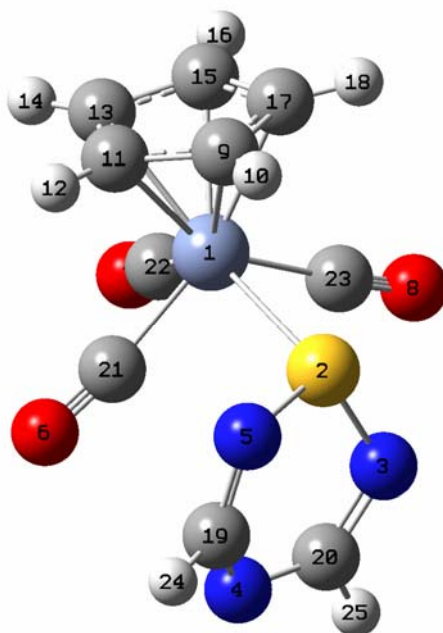

| Center Number | Atom Type | Coordinates (Angstroms) |          |          |
|---------------|-----------|-------------------------|----------|----------|
|               |           | X                       | Y        | Z        |
| 1             | Cr        | 0.871228                | 0.03339  | 0.056854 |
| 2             | S         | -1.27686                | -0.46115 | -1.10309 |
| 3             | N         | -2.18504                | 0.923895 | -1.18482 |
| 4             | N         | -3.35002                | 0.254862 | 0.795534 |
| 5             | N         | -2.20827                | -1.5802  | -0.27441 |
| 6             | O         | -0.81014                | -0.35361 | 2.536148 |
| 7             | O         | 1.825595                | 2.324514 | 1.739789 |
| 8             | O         | 0.505513                | 2.475034 | -1.67652 |
| 9             | C         | 1.310921                | -1.8876  | -0.93753 |
| 10            | H         | 0.656839                | -2.45558 | -1.41782 |
| 11            | C         | 1.65647                 | -2.0006  | 0.406728 |
| 12            | H         | 1.29009                 | -2.6625  | 1.047148 |
| 13            | C         | 2.64471                 | -1.07039 | 0.678068 |
| 14            | H         | 3.12737                 | -0.96509 | 1.536223 |
| 15            | C         | 2.913586                | -0.37419 | -0.51176 |
| 16            | H         | 3.62677                 | 0.299954 | -0.64583 |
| 17            | C         | 2.08022                 | -0.89074 | -1.49663 |
| 18            | H         | 2.087439                | -0.63379 | -2.45467 |
| 19            | C         | -3.09919                | -1.06303 | 0.544512 |
| 20            | C         | -2.97745                | 1.141476 | -0.14552 |
| 21            | C         | -0.24934                | -0.18333 | 1.565043 |
| 22            | C         | 1.464649                | 1.437955 | 1.121674 |
| 23            | C         | 0.578143                | 1.536904 | -1.03713 |
| 24            | H         | -3.75324                | -1.75772 | 1.028787 |
| 25            | H         | -3.4158                 | 2.115569 | -0.08312 |

**Figure S2**  $\text{CpCr(CO)}_2\{\eta^2\text{-SN}_3(\text{CH})_2\}$   
**Endo isomer:** -2104.1323372 Hartree

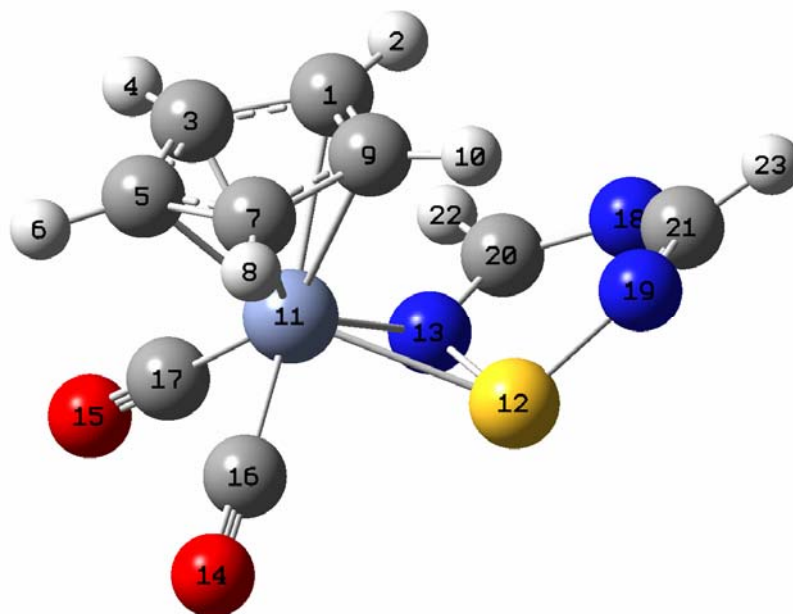

| Center Number | Atom Type | Coordinates (Angstroms) |          |          |
|---------------|-----------|-------------------------|----------|----------|
|               |           | X                       | Y        | Z        |
| 1             | C         | -0.0483                 | 1.953868 | 0.777423 |
| 2             | H         | -0.97229                | 2.070616 | 1.330516 |
| 3             | C         | 1.222161                | 1.638447 | 1.334405 |
| 4             | H         | 1.444836                | 1.520383 | 2.387672 |
| 5             | C         | 2.161484                | 1.55683  | 0.260671 |
| 6             | H         | 3.222346                | 1.360238 | 0.353705 |
| 7             | C         | 1.453666                | 1.796787 | -0.95175 |
| 8             | H         | 1.879214                | 1.80931  | -1.94753 |
| 9             | C         | 0.092012                | 2.047926 | -0.62546 |
| 10            | H         | -0.71172                | 2.229799 | -1.3291  |
| 11            | Cr        | 0.709916                | -0.00674 | 0.013177 |
| 12            | S         | -1.24632                | -0.8751  | -1.04099 |
| 13            | N         | -1.0074                 | -0.91184 | 0.645307 |
| 14            | O         | 2.335833                | -1.54554 | -1.98277 |
| 15            | O         | 2.117212                | -1.85925 | 1.920784 |
| 16            | C         | 1.687495                | -0.97105 | -1.21294 |
| 17            | C         | 1.566973                | -1.1612  | 1.181852 |
| 18            | N         | -3.28811                | -0.2879  | 0.990083 |
| 19            | N         | -2.51319                | 0.26001  | -1.26034 |
| 20            | C         | -2.07783                | -0.65302 | 1.392229 |
| 21            | C         | -3.35304                | 0.264939 | -0.26058 |
| 22            | H         | -1.90836                | -0.72827 | 2.46914  |
| 23            | H         | -4.24212                | 0.876434 | -0.42939 |
